# Supplementary material for: Adherence to the Mediterranean diet is associated with reduced chronic pancreatitis risk: a longitudinal cohort study
Source: Royal Society of Chemistry journal article supplement (doi:10.1039/d4fo02588a), 2024-01-01
Supplement: d4fo02588a1.pdf [file d4fo02588a1.pdf]

## Supplementary Material

### **Adherence to the Mediterranean diet is associated with reduced chronic pancreatitis risk: A longitudinal cohort study**

|                                                                                                                                                                                                                                                              |    |
|--------------------------------------------------------------------------------------------------------------------------------------------------------------------------------------------------------------------------------------------------------------|----|
| Figure S1. Association between Mediterranean diet adherence and the risk of chronic pancreatitis in cumulative incidence curve (n=190,790). .....                                                                                                            | 2  |
| Figure S2. Association between Mediterranean diet adherence and the risk of chronic pancreatitis restricted participants to those who completed at least two 24-hour diet recalls with typical dietary intake in cumulative incidence curve (n=102,401)..... | 3  |
| Table S1. Scoring methods of MEDAS and MEDAS continuous score. ....                                                                                                                                                                                          | 4  |
| Table S2. Components of MEDAS and MEDAS continuous in the UK Biobank study.....                                                                                                                                                                              | 6  |
| Table S3. Scoring methods of the Alternate Mediterranean Diet score (AMED). ....                                                                                                                                                                             | 11 |
| Table S4. Ascertainment of chronic pancreatitis .....                                                                                                                                                                                                        | 12 |
| Table S5. Definition, classification, and missing rates of major covariates. ....                                                                                                                                                                            | 13 |
| Table S6. Association between Mediterranean diet adherence and the risk of chronic pancreatitis using different calculation methods (n=190,790).....                                                                                                         | 15 |
| Table S9. Association between Mediterranean diet adherence and the risk of chronic pancreatitis with further adjustment for body mass index, Charlson comorbidity index, sleep duration, baseline diabetes, and multiple imputation (n=190,790).....         | 18 |
| Table S10. Association between Mediterranean diet adherence and the risk of chronic pancreatitis by excluding participants who developed chronic pancreatitis within 3, 4, and 5 years of follow-up. ....                                                    | 19 |
| Table S11. Association between Mediterranean diet adherence and the risk of chronic pancreatitis restricted participants to those who completed at least two 24-hour diet recalls with typical dietary intake (n=102,401). ....                              | 20 |
| Table S12. Mediation effect of inflammation and metabolic status between the Mediterranean diet adherence defined by the MEDAS continuous score and the risk of chronic pancreatitis. ....                                                                   | 21 |

**Figure S1.** Association between Mediterranean diet adherence and the risk of chronic pancreatitis in cumulative incidence curve (n=190,790).

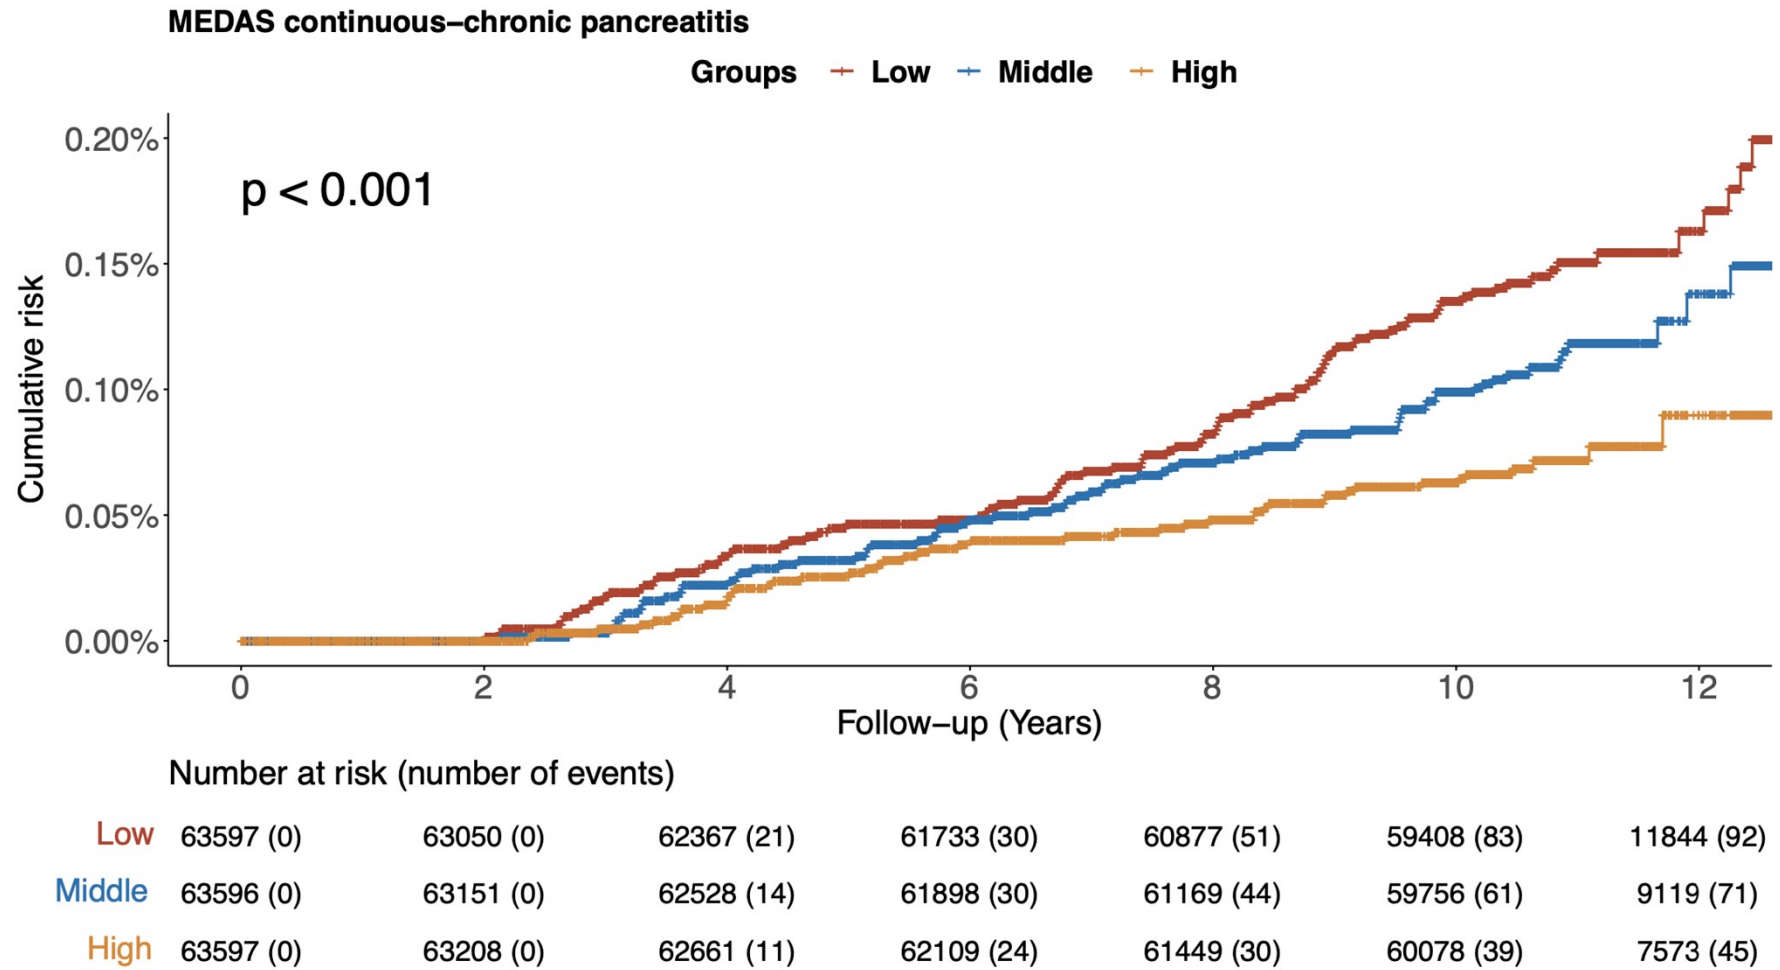

Adherence to the Mediterranean diet was categorized into tertiles according to the MEDAS continuous score (low, medium, and high).

**Figure S2.** Association between Mediterranean diet adherence and the risk of chronic pancreatitis restricted participants to those who completed at least two 24-hour diet recalls with typical dietary intake in cumulative incidence curve (n=102,401)

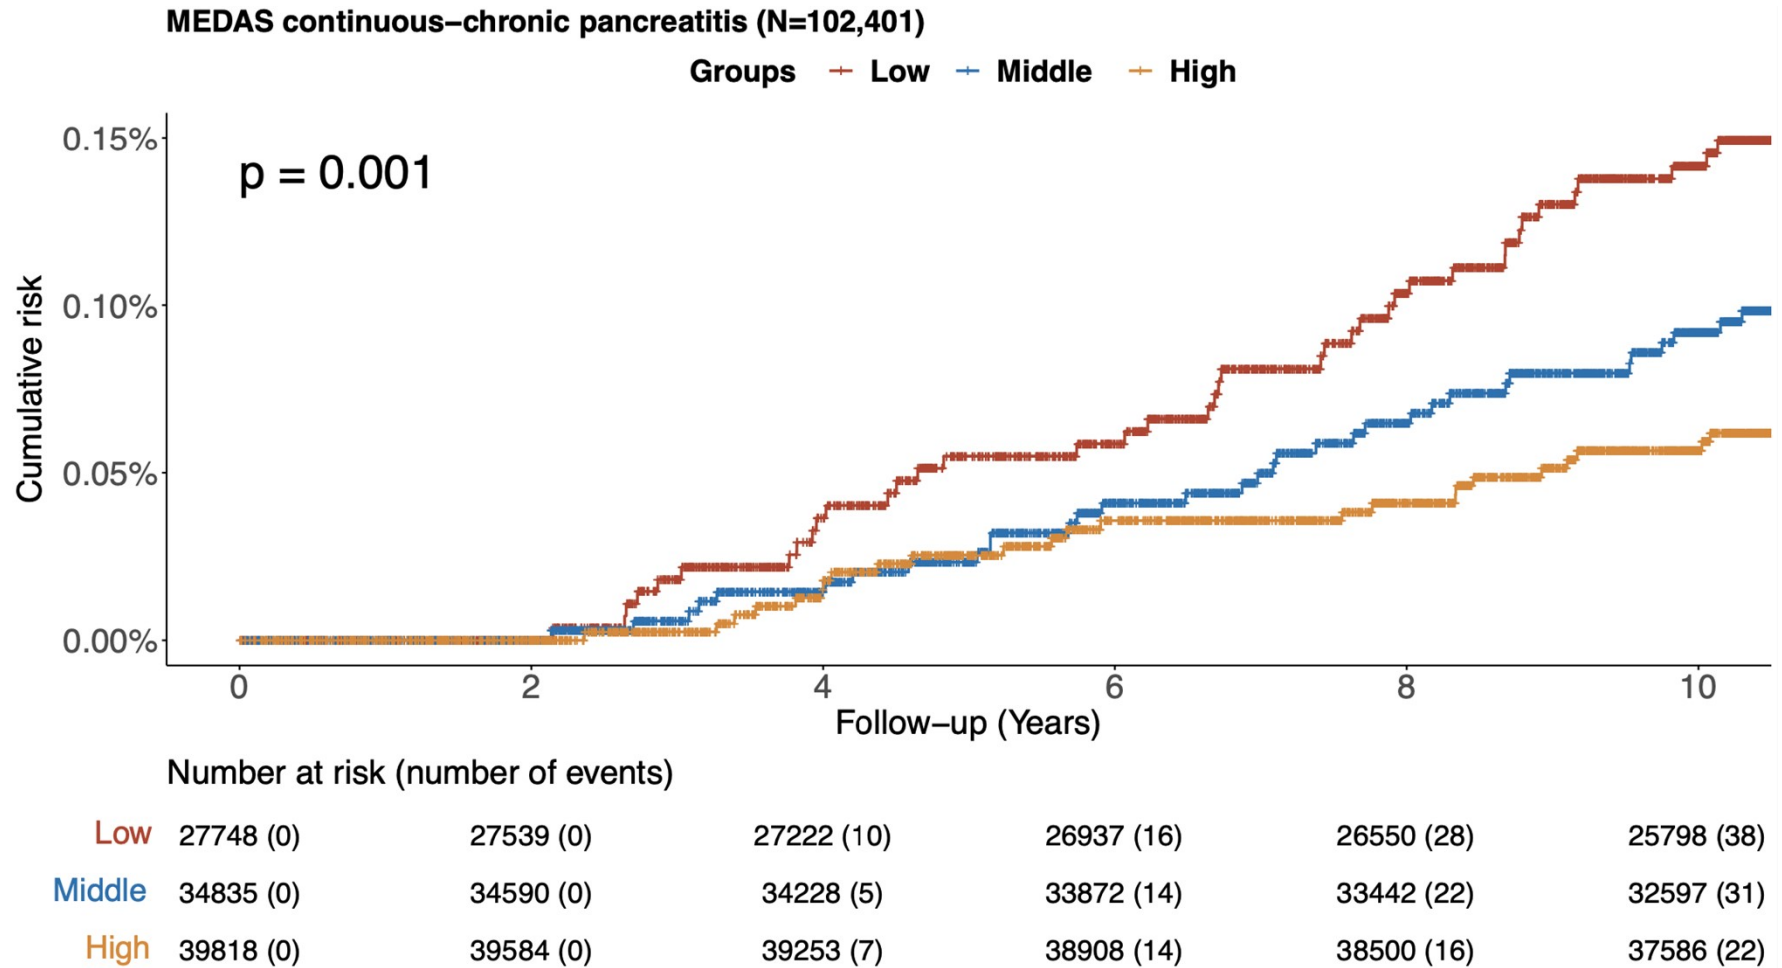

Adherence to the Mediterranean diet was categorized into tertiles according to the MEDAS continuous score (low, medium, and high).

**Table S1.** Scoring methods of MEDAS and MEDAS continuous score.

| <b>Food components</b>  | <b>Per serving</b>                                                                                                                                                                                                                                                                                                                                                                        | <b>Servings required for 1 point</b>                                         |
|-------------------------|-------------------------------------------------------------------------------------------------------------------------------------------------------------------------------------------------------------------------------------------------------------------------------------------------------------------------------------------------------------------------------------------|------------------------------------------------------------------------------|
| Olive oil <sup>1</sup>  | /                                                                                                                                                                                                                                                                                                                                                                                         | Consumption                                                                  |
| Vegetables <sup>2</sup> | 1 serving = 200g, not including potatoes or sweetcorn<br>Total raw vegetables (servings) = Total raw vegetables (g)/200                                                                                                                                                                                                                                                                   | ≥2/day (including ≥1/day raw or salad) <sup>3</sup>                          |
| Legumes <sup>2</sup>    | 1 serving = 150g (including canned varieties)<br>Total pulses (servings) = Total pulses (g)/150                                                                                                                                                                                                                                                                                           | ≥3/week                                                                      |
| Fruit <sup>2</sup>      | not including frozen or dried fruit<br>Total fresh fruit (servings) = Total fresh fruit (g)/80<br>Total fresh fruit juice (servings) = Total fresh fruit juice (ml)/100<br>Total fruit (servings) = Total fresh fruit (servings) + Total fresh fruit juice (servings)                                                                                                                     | ≥3/day                                                                       |
| Nuts <sup>2</sup>       | 1 serving = 30g<br>Total nuts (servings) = Total nuts (g)/30<br>Total nuts (servings/week) = Total nuts (servings/day) *7                                                                                                                                                                                                                                                                 | <3/week                                                                      |
| Seafood <sup>2</sup>    | 1 serving = 100-150 g fish, or 200 g shellfish<br>Total fish (servings) = Total fish (g)/125<br>Total shellfish/seafood (servings) = Total shellfish/seafood (g)/200<br>Total fish and shellfish/seafood (servings) = Total fish (servings) + Total shellfish/seafood (servings)<br>Total fish and shellfish/seafood (servings/week) = Total fish and shellfish/seafood (servings/day) *7 | ≥3/week                                                                      |
| Red meat <sup>4</sup>   | 1 serving = 100-150g<br>Total red meat (servings) = Total red meat (g)/125                                                                                                                                                                                                                                                                                                                | <1/day                                                                       |
| White meat <sup>5</sup> | 1 point: Total poultry and rabbit (g) > Total red meat (g)                                                                                                                                                                                                                                                                                                                                | More white meat than red meat                                                |
| Wine <sup>6</sup>       | 1 point for those with no alcohol intake<br>Total wine intake (servings/week) = Total wine intake (servings/day) /125ml *7                                                                                                                                                                                                                                                                | 1) No alcohol intake (primary analysis)<br>2) ≥7/week (sensitivity analysis) |

|                                             |                                                                                                                                                        |                |
|---------------------------------------------|--------------------------------------------------------------------------------------------------------------------------------------------------------|----------------|
| Sweetened or carbonated drinks <sup>4</sup> | 1 cup = 100 ml<br>Total sugar-sweetened beverages (servings) = Total sugar-sweetened beverages (ml)/100                                                | <1/day         |
| Sweets or pastries <sup>4</sup>             | Frequency of consumption of commercial sweets and pastries (times/week) =<br>Frequency of consumption of commercial sweets and pastries (times/day) *7 | <2/week        |
| Butter, margarine or cream <sup>4</sup>     | 1 serving = 12g, 1 tablespoon<br>Total butter, margarine, cream (servings) = Total butter, margarine, cream (g)/12                                     | <1/day         |
| Sofrito <sup>2</sup>                        | 1 point: Frequency of consumption of sofrito (times/week) $\geq 2$                                                                                     | $\geq 2$ /week |

<sup>1</sup> Individuals reporting olive oil consumption were assigned 1 point, while non-consumers received 0 points. Due to the inability to quantify the amount consumed, only one item for olive oil intake was assessed, whereas the traditional MEDAS score includes two items for olive oil.

<sup>2</sup> A high intake of vegetables, fruit, legumes, seafood, nuts, and sofrito was recommended. For MEDAS continuous, points ranged from 0 for no consumption to 1 for meeting recommended intake levels.

<sup>3</sup> For MEDAS continuous, participants who did not consume 1 serving per day of raw vegetables or salad received a maximum score of 0.5 points. Conversely, those not meeting this criterion received 0 points, regardless of their overall vegetable intake. This assessment was based on the question documented in the UK Biobank dataset: "On average, how many heaped tablespoons of salad or raw vegetables do you consume per day? (Include lettuce and tomato in sandwiches; enter '0' if you do not consume any)."

<sup>4</sup> A low intake of red meat, butter, margarine, or cream, sweetened or carbonated drinks, and sweets or pastries was recommended. For MEDAS continuous, points were assigned continuously, ranging from 0 for double the recommended intake to 1 for consumption below the recommended level.

<sup>5</sup> For white meat, participants received 1 point if the total intake exceeded that of red meat.

<sup>6</sup> A moderate to high intake of alcohol was originally recommended in the MEDAS scale. However, due to alcohol consumption being the primary risk factor for chronic pancreatitis, the scoring was adapted: 1 point was assigned to those with no alcohol intake, and 0 points for any alcohol intake. In the sensitivity analyses, we followed the conventional calculation by treating  $\geq 7$  servings of wine per week as the cut-off.

**Table S2.** Components of MEDAS and MEDAS continuous in the UK Biobank study.

| <b>Data field ID</b> | <b>Food item</b>                  | <b>MEDAS / MEDAS continuous components</b> |
|----------------------|-----------------------------------|--------------------------------------------|
| 20090                | Type of fat/ oil used for cooking | Olive oil                                  |
| 104060               | Mixed vegetable intake            | Vegetables                                 |
| 104070               | Vegetable pieces intake           | Vegetables                                 |
| 104090               | Side salad intake                 | Vegetables                                 |
| 104080               | Coleslaw                          | Vegetables                                 |
| 104100               | Avocado intake                    | Vegetables                                 |
| 104130               | Beetroot intake                   | Vegetables                                 |
| 104140               | Broccoli intake                   | Vegetables                                 |
| 104150               | Butternut squash intake           | Vegetables                                 |
| 104160               | Cabbage/kale intake               | Vegetables                                 |
| 104170               | Carrot intake                     | Vegetables                                 |
| 104180               | Cauliflower intake                | Vegetables                                 |
| 104190               | Celery intake                     | Vegetables                                 |
| 104200               | Courgette intake                  | Vegetables                                 |
| 104210               | Cucumber intake                   | Vegetables                                 |
| 104220               | Garlic intake                     | Vegetables                                 |
| 104230               | Leek intake                       | Vegetables                                 |
| 104240               | Lettuce intake                    | Vegetables                                 |
| 104250               | Mushroom intake                   | Vegetables                                 |
| 104260               | Onion intake                      | Vegetables                                 |
| 102490               | Oliver intake                     | Vegetables                                 |
| 104270               | Parsnip intake                    | Vegetables                                 |
| 104290               | Sweet pepper intake               | Vegetables                                 |
| 104300               | Spinach intake                    | Vegetables                                 |
| 104310               | Sprouts intake                    | Vegetables                                 |
| 104320               | Sweetcorn intake                  | Vegetables                                 |
| 104340               | Fresh tomato intake               | Vegetables                                 |
| 104350               | Tinned tomato intake              | Vegetables                                 |

|               |                                                        |            |
|---------------|--------------------------------------------------------|------------|
| 104360        | Turnip/swede intake                                    | Vegetables |
| 104370        | Watercress intake                                      | Vegetables |
| 104380        | Other vegetables intake                                | Vegetables |
| 20088         | guacamole                                              | Vegetables |
| 102540, 20108 | pulses from canned soup                                | Vegetables |
| 102620, 20109 | vegetables from homemade soup                          | Vegetables |
| 104280        | Pea intake                                             | Legumes    |
| 104120        | Green bean intake                                      | Legumes    |
| 104000        | Baked bean intake                                      | Legumes    |
| 104110        | Broad bean intake                                      | Legumes    |
| 104010        | Pulses intake kidney beans/chick peas/butter beans etc | Legumes    |
| 103270        | tofu                                                   | Legumes    |
| 20088         | hummus                                                 | Legumes    |
| 102540, 20108 | pulses from canned soup                                | Legumes    |
| 102620, 20109 | homemade soup (pulses) Ingredients in homemade soup    | Legumes    |
| 100190        | Orange juice intake                                    | Fruit      |
| 100200        | Grapefruit juice intake                                | Fruit      |
| 104410        | Stewed fruit intake                                    | Fruit      |
| 104420        | Prune intake                                           | Fruit      |
| 104430        | Dried fruit intake                                     | Fruit      |
| 104440        | Mixed fruit intake                                     | Fruit      |
| 104450        | Apple intake                                           | Fruit      |
| 104460        | Banana intake                                          | Fruit      |
| 104470        | Berry intake                                           | Fruit      |
| 104480        | Cherry intake                                          | Fruit      |
| 104490        | Grapefruit intake                                      | Fruit      |
| 104500        | Grape intake                                           | Fruit      |
| 104510        | Mango intake                                           | Fruit      |
| 104520        | Melon intake                                           | Fruit      |
| 104530        | Orange intake                                          | Fruit      |
| 104540        | Satsuma intake                                         | Fruit      |
| 104550        | Peach/nectarine intake                                 | Fruit      |

|               |                                                            |            |
|---------------|------------------------------------------------------------|------------|
| 104560        | Pear intake                                                | Fruit      |
| 104570        | Pineapple intake                                           | Fruit      |
| 104580        | Plum intake                                                | Fruit      |
| 104590        | Other fruit intake                                         | Fruit      |
| 102420        | Unsalted peanuts intake                                    | Nuts       |
| 102440        | Unsalted nuts intake                                       | Nuts       |
| 102450        | Seeds intake                                               | Nuts       |
| 102430        | Salted nuts                                                | Nuts       |
| 20088         | peanut butter                                              | Nuts       |
| 103020        | Beef intake                                                | Red meat   |
| 103030        | Pork intake                                                | Red meat   |
| 103040        | Lamb intake                                                | Red meat   |
| 103100        | Other meat                                                 | Red meat   |
| 102540, 20108 | red meat from canned soup                                  | Red meat   |
| 102620, 20109 | homemade soup (meat) Ingredients in homemade soup          | Red meat   |
| 103070        | Bacon intake                                               | Red meat   |
| 103080        | Ham intake (ham, Parma ham, salami, pastrami, cured meats) | Red meat   |
| 103010        | Sausage intake                                             | Red meat   |
| 103090        | Liver                                                      | Red meat   |
| 103060        | Poultry                                                    | White meat |
| 103050        | Breaded poultry                                            | White meat |
| 102540        | White meat from canned soup                                | White meat |
| 102620        | White meat from homemade soup                              | White meat |
| 103180        | Battered fish                                              | Seafood    |
| 103170        | Breaded fish                                               | Seafood    |
| 103150        | Tinned tuna intake                                         | Seafood    |
| 103160        | Oily fish intake                                           | Seafood    |
| 103190        | White fish intake                                          | Seafood    |
| 103200        | Prawns intake                                              | Seafood    |
| 103210        | Lobster/crab intake                                        | Seafood    |
| 103220        | Shellfish intake                                           | Seafood    |
| 103230        | Other fish intake                                          | Seafood    |



|               |                                                   |                                |
|---------------|---------------------------------------------------|--------------------------------|
| 102540, 20108 | Fish from canned soup                             | Seafood                        |
| 102620, 20109 | homemade soup (fish) Ingredients in homemade soup | Seafood                        |
| 100170        | Fizzy drinks                                      | Sweetened or carbonated drinks |
| 100160        | Low calories drinks                               | Sweetened or carbonated drinks |
| 100180        | Squash intake                                     | Sweetened or carbonated drinks |
| 102350        | Chocolate biscuit                                 | Sweets or pastries             |
| 102340        | Chocolate covered biscuit                         | Sweets or pastries             |
| 102260        | Chocolate bar                                     | Sweets or pastries             |
| 102310        | Chocolate sweets                                  | Sweets or pastries             |
| 102300        | Chocolate raisins                                 | Sweets or pastries             |
| 102290        | Dark chocolate                                    | Sweets or pastries             |
| 102280        | Milk chocolate                                    | Sweets or pastries             |
| 102270        | White chocolate                                   | Sweets or pastries             |
| 102360        | Sweet biscuits                                    | Sweets or pastries             |
| 102190        | Cakes                                             | Sweets or pastries             |
| 102220        | Cheesecake                                        | Sweets or pastries             |
| 102200        | Doughnut                                          | Sweets or pastries             |
| 102180        | Fruitcake                                         | Sweets or pastries             |
| 102060        | Danish pastry                                     | Sweets or pastries             |
| 102210        | Sponge pudding                                    | Sweets or pastries             |
| 102140        | Milk based pudding                                | Sweets or pastries             |
| 102150        | Other milk-based pudding                          | Sweets or pastries             |
| 102230        | Other desert intake                               | Sweets or pastries             |
| 102170        | Soya desert intake                                | Sweets or pastries             |
| 102330        | Sweets                                            | Sweets or pastries             |
| 102320        | Diet sweets                                       | Sweets or pastries             |
| 102380        | Other sweets                                      | Sweets or pastries             |
| 102120        | Ice cream                                         | Sweets or pastries             |
| 104040        | Butter/ margarine on potato                       | Butter, margarine or cream     |
| 20088         | Cream                                             | Butter, margarine or cream     |
| 101350, 20099 | Baguettes with butter/ margarine                  | Butter, margarine or cream     |
| 101390, 20100 | Baps with butter/ margarine                       | Butter, margarine or cream     |

|               |                                             |                            |
|---------------|---------------------------------------------|----------------------------|
| 101430, 20101 | Bread rolls with butter/ margarine          | Butter, margarine or cream |
| 101310, 20098 | Bread slices with butter/ margarine         | Butter, margarine or cream |
| 101470, 20102 | Crackers/ crispbread with butter/ margarine | Butter, margarine or cream |
| 101510, 20103 | Oatcakes with butter/ margarine             | Butter, margarine or cream |
| 101550, 20104 | Other bread with butter/ margarine          | Butter, margarine or cream |
| 20090         | Butter/ margarine used in cooking           | Butter, margarine or cream |
| 20088         | Tomato-based sauce                          | Sofrito                    |
| 20095, 100670 | White wine intake                           | Alcohol                    |
| 20096, 100590 | Red wine intake                             | Alcohol                    |
| 20097, 100630 | Rose wine intake                            | Alcohol                    |
| 100710        | Beer/cider intake                           | Alcohol                    |
| 100720        | Fortified wine intake                       | Alcohol                    |
| 100730        | Spirits intake                              | Alcohol                    |
| 100740        | Other alcohol intake                        | Alcohol                    |

---

**Table S3.** Scoring methods of the Alternate Mediterranean Diet score (AMED).

| Food components                                         | Scoring                                                                                                                                            |
|---------------------------------------------------------|----------------------------------------------------------------------------------------------------------------------------------------------------|
| Vegetables (excluding potatoes, legumes or fruit juice) | Sex-specific median intakes were used as cut points. Intakes above the median were given 1 point and intakes below the median were given 0 points. |
| Legumes                                                 |                                                                                                                                                    |
| Fruit and nuts                                          |                                                                                                                                                    |
| Cereals                                                 |                                                                                                                                                    |
| Fish and seafood                                        |                                                                                                                                                    |
| Monounsaturated/ saturated fats ratio                   |                                                                                                                                                    |
| Dairy products                                          | Sex-specific median intakes were used as cut points. Intakes below the median were given 1 point and intakes above the median were given 0 points. |
| Meat and meat products                                  |                                                                                                                                                    |
| Alcohol                                                 | 1 point was assigned to those who had moderate alcohol consumption (10–25 g/day for men and 5–15 g/day for women).                                 |

Abbreviations: AMED, Alternate Mediterranean Diet score.

**Table S4.** Ascertainment of chronic pancreatitis

| Source <sup>a</sup>     | Details                                                                                                                                                                                                   |                    |                                                                                                                                |
|-------------------------|-----------------------------------------------------------------------------------------------------------------------------------------------------------------------------------------------------------|--------------------|--------------------------------------------------------------------------------------------------------------------------------|
| Hospital inpatient data | ICD-9 and -10 coded hospital inpatient episodes obtained from the Hospital Episode Statistics provider for England, the Patient Episode Data for Wales and the Scottish Morbidity Records for Scotland.   | ICD-9<br>ICD-10    | 577.1<br>K86.0 (Alcohol-induced chronic pancreatitis), K86.1 (Other chronic pancreatitis)                                      |
| Primary care data       | Coded data from primary care records, including diagnoses, prescriptions, referrals etc. using the clinical coding classification Read v2 and Clinical Terms Version 3 (CTV3 or Read v3).                 | Read v2<br>Read v3 | "J671.", "J6710", "J6711", "Jyu84"<br>"J671.", "X308h", "X308v", "Xa7na", "Jyu84", "X308u", "X308w", "X308x", "X308y", "X308z" |
| Death registry          | ICD-10 coded national death registry data obtained from the Health and Social Care Information Centre (now NHS Digital) for England and Wales and the Information Services Department (ISD) for Scotland. | ICD-10             | K86.0, K86.1                                                                                                                   |

Abbreviations: ICD, International Classification of Diseases; Read v2, Read Version 2; Read v3, Read Version 3.

<sup>a</sup>Data available for all sources (Data Portal censoring date):

1. Hospital inpatient data: 31 October 2022 (Hospital Episode Statistics for England); 31 August 2022 (Scottish Morbidity Record); 31 May 2022 (Patient Episode Database for Wales);
2. Primary care (GP) data: 31 May 2016 (England, TPP); 31 May 2017 (England, version); 31 March 2017 (Scotland); 31 Aug 2017 (Wales).
3. Death data: 30 November 2023 (England & Wales); 31 December 2023 (Scotland);

<sup>b</sup>Primary care data was extracted from the category (first occurrences) in UKB (<https://biobank.ndph.ox.ac.uk/showcase/label.cgi?id=1712> (access on Sept 2, 2024))

<sup>c</sup>Death register included 30 November 2023 (England & Wales); 31 December 2023 (Scotland).

**Table S5.** Definition, classification, and missing rates of major covariates.

| <b>Covariates</b>                | <b>Description</b>                                                                                                                                                                                                                                                                                                                                                                                                                                                                                                                                                                                                                                          | <b>Missing rate (%)</b> |
|----------------------------------|-------------------------------------------------------------------------------------------------------------------------------------------------------------------------------------------------------------------------------------------------------------------------------------------------------------------------------------------------------------------------------------------------------------------------------------------------------------------------------------------------------------------------------------------------------------------------------------------------------------------------------------------------------------|-------------------------|
| Age                              | Age at recruitment was derived by subtracting the date of recruitment from the date of birth and UK Biobank calculated the variable truncating to the whole year.                                                                                                                                                                                                                                                                                                                                                                                                                                                                                           | /                       |
| Sex                              | It was treated as a categorical variable (“Female” and “Male”).                                                                                                                                                                                                                                                                                                                                                                                                                                                                                                                                                                                             | /                       |
| Ethnicity                        | The ethnic groups for participants to choose from are: “White” (including British, Irish, any other White background), “Mixed” (including White and the Black Caribbean, White and Black African, White and Asian, any other mixed background), “Asian or Asian British” (including Indian, Pakistani, Bangladeshi, any other Asian background), “Black or Black British” (including Caribbean, African, any other Black background), “Chinese”, “Other ethnic group”, “Do not know” or “Prefer not to answer”. We treated it as a binary variable (“White” and “Others”).                                                                                  | 683 (0.36%)             |
| Townsend deprivation index (TDI) | TDI at recruitment was obtained from local NHS Primary Care Trust registries. It was calculated based on the national census output areas corresponding to participants’ postcodes <sup>40</sup> . Higher scores of TDI indicate greater levels of deprivation. The variable has been grouped as “low deprivation”, “moderate deprivation”, and “high deprivation” based on the tertiles.                                                                                                                                                                                                                                                                   | 231 (0.12%)             |
| Education level                  | The educational qualification categories available for participants to choose from were as follows: “College or University degree,” “A levels/AS levels or equivalent,” “O levels/GCSEs or equivalent,” “CSEs or equivalent,” “NVQ or HND or HNC or equivalent,” “Other professional qualifications, e.g., nursing, teaching,” “None of the above,” and “Prefer not to answer.” Except for the first and last options, all other options are lower than college qualification. This was treated as a binary variable (“College and above” and “Below college”), with all options except “College or University degree” placed in the group “Below college”. | 929 (0.49%)             |
| Smoking status                   | Data on smoking status was based on a touchscreen questionnaire completed at the Assessment Centre. The smoking status available for participants to choose from is:                                                                                                                                                                                                                                                                                                                                                                                                                                                                                        | 492 (0.26%)             |

|                                  |                                                                                                                                                                                                                                                                                                                                                                                                                                                                                                                                                                       |               |
|----------------------------------|-----------------------------------------------------------------------------------------------------------------------------------------------------------------------------------------------------------------------------------------------------------------------------------------------------------------------------------------------------------------------------------------------------------------------------------------------------------------------------------------------------------------------------------------------------------------------|---------------|
|                                  | “Never”, “Previous”, “Current”, and “Prefer not to answer”.                                                                                                                                                                                                                                                                                                                                                                                                                                                                                                           |               |
| Physical activity                | Physical activity was based on the direct results of the adapted International Physical Activity Questionnaire (IPAQ) documented by UK Biobank, and categorized as low, moderate, and high.                                                                                                                                                                                                                                                                                                                                                                           | 28950 (15.2%) |
| Body mass index (BMI)            | BMI was calculated using the formula ‘BMI (kg/m <sup>2</sup> ) = Weight (kg) / Height <sup>2</sup> (m <sup>2</sup> )’. It was constructed from weight and height immediately after physical measurement at the assessment center. We then categorized the BMI into three groups based on the data distribution as follows: normal or underweight <25 kg/m <sup>2</sup> , overweigh 25-29.9 kg/m <sup>2</sup> , and obese ≥30 kg/m <sup>2</sup> according to the World Health Organisation (WHO) and the National Institute for Health and Clinical Excellence (NICE). | 519 (0.27%)   |
| Charlson Comorbidity Index (CCI) | CCI scores were computed based on 17 comorbidities, each assigned a weighted value according to their severity and mortality risk. The higher the score, the more likely the predicted negative outcome (like death) will occur. This index is widely used in health research to adjust for the severity of comorbid conditions in risk adjustment models.                                                                                                                                                                                                            | /             |
| Sleep duration                   | Sleep duration was based on a single question: About how many hours sleep do you get in every 24 hours (please include naps)? It has been treated as a continuous variable.                                                                                                                                                                                                                                                                                                                                                                                           | 555 (0.29%)   |
| Baseline diabetes                | Baseline diabetes was ascertained by self-reported medical conditions and International Classification of Diseases (ICD)-9 (25000, 25010, 25020, 25090, 25001, 25011, 25021, 25091), and ICD-10 (E11, E110, E111, E112, E113, E114, E115, E116, E117, E117, E119, E10, E100, E101, E102, E103, E104, E105, E106, E107, E108, E109) based on inpatient and primary care data.                                                                                                                                                                                          | /             |
| Total energy intake              | Total energy intake was defined as the energy from the overall diet, estimated from the past 24 hours (continuous, kcal/day).                                                                                                                                                                                                                                                                                                                                                                                                                                         | /             |

**Table S6.** Association between Mediterranean diet adherence and the risk of chronic pancreatitis using different calculation methods (n=190,790).

|                         | Cases/person-year | Minimally adjusted model <sup>1</sup> |              | Fully adjusted model <sup>2</sup> |              |
|-------------------------|-------------------|---------------------------------------|--------------|-----------------------------------|--------------|
|                         |                   | HR (95%CI)                            | <i>P</i>     | HR (95%CI)                        | <i>P</i>     |
| <b>MEDAS continuous</b> |                   |                                       |              |                                   |              |
| Per SD                  |                   | <b>0.78 [0.68, 0.89]</b>              | <b>0.003</b> | <b>0.82 [0.71, 0.94]</b>          | <b>0.005</b> |
| Low                     | 96/696,611        | Ref                                   |              | Ref                               |              |
| Moderate                | 64/687,734        | <b>0.69 [0.50, 0.94]</b>              | <b>0.020</b> | 0.74 [0.54, 1.02]                 | 0.067        |
| High                    | 54/681,123        | <b>0.59 [0.42, 0.83]</b>              | <b>0.003</b> | <b>0.66 [0.47, 0.93]</b>          | <b>0.018</b> |
| <i>p</i> -trend         |                   |                                       | <b>0.002</b> |                                   | <b>0.014</b> |
| <b>MEDAS binary</b>     |                   |                                       |              |                                   |              |
| Per SD                  |                   | <b>0.81 [0.71, 0.93]</b>              | <b>0.003</b> | <b>0.84 [0.73, 0.97]</b>          | <b>0.015</b> |
| Low                     | 91/687,739        | Ref                                   |              | Ref                               |              |
| Moderate                | 64/687,304        | <b>0.68 [0.49, 0.94]</b>              | <b>0.018</b> | 0.73 [0.53, 1.00]                 | 0.052        |
| High                    | 59/690,425        | <b>0.63 [0.45, 0.87]</b>              | <b>0.006</b> | <b>0.68 [0.49, 0.96]</b>          | <b>0.028</b> |
| <i>p</i> -trend         |                   |                                       | <b>0.005</b> |                                   | <b>0.023</b> |
| <b>AMED</b>             |                   |                                       |              |                                   |              |
| Per SD                  |                   | <b>0.84 [0.73, 0.96]</b>              | <b>0.010</b> | 0.88 [0.77, 1.01]                 | 0.073        |
| Low                     | 88/693,851        | Ref                                   |              | Ref                               |              |
| Moderate                | 72/689,465        | 0.81 [0.60, 1.11]                     | 0.197        | 0.86 [0.63, 1.18]                 | 0.356        |
| High                    | 54/682,152        | <b>0.67 [0.47, 0.94]</b>              | <b>0.020</b> | 0.74 [0.53, 1.05]                 | 0.095        |
| <i>p</i> -trend         |                   |                                       | <b>0.018</b> |                                   | 0.092        |

Abbreviations: MEDAS, Mediterranean Diet Adherence Screener (score); HR, hazard ratio; CI, confidence interval.

<sup>1</sup> Minimally adjusted model adjusted for age, sex, and total energy intake.

<sup>2</sup> Fully adjusted model additionally adjusted for ethnicity, education, Townsend deprivation index, smoking status, and physical activity for MEDAS binary and AMED.

**Supplementary Table S7.** Association between Mediterranean diet adherence and risk of chronic pancreatitis after sequentially removing each component from total score (n=190,790).

| Food components             |                 | HR (95%CI)               | P            | Food components                         |                 | HR (95%CI)               | P            |
|-----------------------------|-----------------|--------------------------|--------------|-----------------------------------------|-----------------|--------------------------|--------------|
| Removing olive oil          | Per SD          | <b>0.85 [0.74, 0.98]</b> | <b>0.022</b> | Removing sweetened or carbonated drinks | Per SD          | <b>0.86 [0.75, 0.99]</b> | <b>0.030</b> |
|                             | Low             | Ref                      |              |                                         | Low             | Ref                      |              |
|                             | Moderate        | 1.07 [0.78, 1.45]        | 0.674        |                                         | Moderate        | 0.93 [0.68, 1.27]        | 0.639        |
|                             | High            | 0.71 [0.49, 1.01]        | 0.057        |                                         | High            | 0.75 [0.53, 1.06]        | 0.103        |
|                             | <i>p</i> -trend |                          | 0.077        |                                         | <i>p</i> -trend |                          | 0.110        |
| Removing sofrito            | Per SD          | <b>0.82 [0.71, 0.94]</b> | <b>0.005</b> | Removing butter, margarine or cream     | Per SD          | <b>0.85 [0.74, 0.98]</b> | <b>0.022</b> |
|                             | Low             | Ref                      |              |                                         | Low             | Ref                      |              |
|                             | Moderate        | 0.85 [0.63, 1.16]        | 0.307        |                                         | Moderate        | 0.84 [0.62, 1.15]        | 0.289        |
|                             | High            | <b>0.57 [0.40, 0.82]</b> | <b>0.003</b> |                                         | High            | <b>0.64 [0.45, 0.91]</b> | <b>0.012</b> |
|                             | <i>p</i> -trend |                          | <b>0.003</b> |                                         | <i>p</i> -trend |                          | <b>0.012</b> |
| Removing white meat         | Per SD          | <b>0.81 [0.71, 0.93]</b> | <b>0.003</b> | Removing red meat                       | Per SD          | <b>0.82 [0.71, 0.94]</b> | <b>0.005</b> |
|                             | Low             | Ref                      |              |                                         | Low             | Ref                      |              |
|                             | Moderate        | 0.83 [0.61, 1.14]        | 0.251        |                                         | Moderate        | 0.76 [0.56, 1.04]        | 0.091        |
|                             | High            | <b>0.58 [0.41, 0.84]</b> | <b>0.003</b> |                                         | High            | <b>0.58 [0.41, 0.83]</b> | <b>0.003</b> |
|                             | <i>p</i> -trend |                          | <b>0.003</b> |                                         | <i>p</i> -trend |                          | <b>0.002</b> |
| Removing sweets or pastries | Per SD          | <b>0.82 [0.71, 0.94]</b> | <b>0.004</b> | Removing fruit                          | Per SD          | <b>0.82 [0.71, 0.94]</b> | <b>0.004</b> |
|                             | Low             | Ref                      |              |                                         | Low             | Ref                      |              |
|                             | Moderate        | <b>0.67 [0.49, 0.92]</b> | <b>0.014</b> |                                         | Moderate        | 0.81 [0.59, 1.10]        | 0.178        |
|                             | High            | <b>0.57 [0.40, 0.81]</b> | <b>0.002</b> |                                         | High            | <b>0.59 [0.42, 0.84]</b> | <b>0.004</b> |
|                             | <i>p</i> -trend |                          | <b>0.001</b> |                                         | <i>p</i> -trend |                          | <b>0.004</b> |
| Removing seafood            | Per SD          | <b>0.82 [0.72, 0.95]</b> | <b>0.006</b> | Removing vegetable                      | Per SD          | <b>0.83 [0.72, 0.95]</b> | <b>0.008</b> |
|                             | Low             | Ref                      |              |                                         | Low             | Ref                      |              |
|                             | Moderate        | 0.93 [0.69, 1.26]        | 0.635        |                                         | Moderate        | 0.88 [0.65, 1.20]        | 0.421        |
|                             | High            | <b>0.55 [0.38, 0.80]</b> | <b>0.002</b> |                                         | High            | <b>0.61 [0.43, 0.87]</b> | <b>0.006</b> |
|                             | <i>p</i> -trend |                          | <b>0.002</b> |                                         | <i>p</i> -trend |                          | <b>0.007</b> |
| Removing legumes            | Per SD          | <b>0.82 [0.72, 0.95]</b> | <b>0.006</b> | Removing alcohol                        | Per SD          | <b>0.81 [0.70, 0.93]</b> | <b>0.003</b> |
|                             | Low             | Ref                      |              |                                         | Low             | Ref                      |              |
|                             | Moderate        | 0.92 [0.68, 1.26]        | 0.614        |                                         | Moderate        | 0.78 [0.57, 1.07]        | 0.121        |
|                             | High            | <b>0.68 [0.47, 0.96]</b> | <b>0.030</b> |                                         | High            | <b>0.65 [0.46, 0.91]</b> | <b>0.014</b> |
|                             | <i>p</i> -trend |                          | <b>0.035</b> |                                         | <i>p</i> -trend |                          | <b>0.012</b> |
| Removing nuts               | Per SD          | <b>0.84 [0.73, 0.96]</b> | <b>0.012</b> |                                         |                 |                          |              |
|                             | Low             | Ref                      |              |                                         |                 |                          |              |
|                             | Moderate        | 0.84 [0.62, 1.14]        | 0.269        |                                         |                 |                          |              |
|                             | High            | <b>0.59 [0.41, 0.84]</b> | <b>0.003</b> |                                         |                 |                          |              |
|                             | <i>p</i> -trend |                          | <b>0.004</b> |                                         |                 |                          |              |

Model adjusted for age, sex, total energy intake, ethnicity, education, Townsend deprivation index, smoking status, and physical activity.



**Supplementary Table S8.** Association between Mediterranean diet adherence and risk of chronic pancreatitis according to each food component (n=190,790).

| <b>Food components</b> | <b>Score</b>                              | <b>HR (95%CI)</b>        | <b>P</b>     | <b>Food components</b>         | <b>Score</b>                      | <b>HR (95%CI)</b>        | <b>P</b>     |
|------------------------|-------------------------------------------|--------------------------|--------------|--------------------------------|-----------------------------------|--------------------------|--------------|
| Olive oil              | Per SD score increment                    | <b>0.86 [0.75, 0.99]</b> | <b>0.036</b> | Sweetened or carbonated drinks | Per SD score increment            | <b>0.85 [0.75, 0.97]</b> | <b>0.015</b> |
|                        | 0 points (no consumption)                 | Ref                      |              |                                | 0 points ( $\geq 1$ serving /day) | Ref                      |              |
|                        | 1 point (consumption)                     | <b>0.74 [0.56, 0.98]</b> | <b>0.036</b> |                                | 1 point ( $< 1$ serving /day)     | <b>0.72 [0.55, 0.95]</b> | <b>0.021</b> |
| Sofrito                | Per SD score increment                    | 1.02 [0.89, 1.17]        | 0.790        | Butter, margarine or cream     | Per SD                            | <b>0.87 [0.78, 0.98]</b> | <b>0.025</b> |
|                        | 0 points ( $< 2$ servings/week)           | Ref                      |              |                                | 0 points ( $\geq 1$ serving/day)  | Ref                      |              |
|                        | 1 point ( $\geq 2$ servings/week)         | 0.96 [0.40, 2.33]        | 0.928        |                                | 1 point ( $< 1$ serving/day)      | 0.80 [0.61, 1.07]        | 0.129        |
| White meat             | Per SD score increment                    | 1.01 [0.88, 1.16]        | 0.878        | Red meat                       | Per SD score increment            | 1.01 [0.90, 1.14]        | 0.834        |
|                        | 0 points (more consumption than red meat) | Ref                      |              |                                | 0 points ( $\geq 1$ serving/day)  | Ref                      |              |
|                        | 1 point (less consumption than red meat)  | 1.02 [0.75, 1.40]        | 0.878        |                                | 1 point ( $< 1$ serving/day)      | 1.03 [0.68, 1.56]        | 0.878        |
| Sweets or pastries     | Per SD score increment                    | 0.99 [0.87, 1.14]        | 0.927        | Fruit                          | Per SD score increment            | 0.98 [0.86, 1.12]        | 0.742        |
|                        | 0 points ( $\geq 2$ times/week)           | Ref                      |              |                                | 0 points ( $< 3$ servings/day)    | Ref                      |              |
|                        | 1 point ( $< 2$ times/week)               | 1.14 [0.81, 1.59]        | 0.453        |                                | 1 point ( $\geq 3$ servings/day)  | 0.98 [0.75, 1.30]        | 0.913        |
| Seafood                | Per SD score increment                    | 0.95 [0.83, 1.09]        | 0.479        | Vegetable                      | Per SD score increment            | 0.91 [0.79, 1.05]        | 0.204        |
|                        | 0 points ( $< 3$ servings/week)           | Ref                      |              |                                | 0 points ( $< 2$ servings/day)    | Ref                      |              |
|                        | 1 point ( $\geq 3$ servings/week)         | 0.85 [0.61, 1.19]        | 0.339        |                                | 1 point ( $\geq 2$ servings/day)  | 0.72 [0.43, 1.23]        | 0.234        |
| Legumes                | Per SD score increment                    | 0.96 [0.84, 1.09]        | 0.512        | Alcohol                        | Per SD score increment            | 1.04 [0.91, 1.20]        | 0.557        |
|                        | 0 points ( $< 3$ servings/week)           | Ref                      |              |                                | 0 points (consumption)            | Ref                      |              |
|                        | 1 point ( $\geq 3$ servings/week)         | 1.01 [0.74, 1.38]        | 0.963        |                                | 1 point (no consumption)          | 1.09 [0.82, 1.44]        | 0.557        |
| Nuts                   | Per SD score increment                    | 0.88 [0.75, 1.02]        | 0.094        |                                |                                   |                          |              |
|                        | 0 points ( $< 3$ servings/day)            | Ref                      |              |                                |                                   |                          |              |
|                        | 1 point ( $\geq 3$ servings/week)         | 0.67 [0.41, 1.08]        | 0.101        |                                |                                   |                          |              |

Model adjusted for age, sex, total energy intake, ethnicity, education, Townsend deprivation index, smoking status, and physical activity.

**Table S9.** Association between Mediterranean diet adherence and the risk of chronic pancreatitis with further adjustment for body mass index, Charlson comorbidity index, sleep duration, baseline diabetes, and multiple imputation (n=190,790).

| MEDAS continuous | Further adjusted for BMI <sup>1</sup>            |              | Further adjusted for CCI (continuous) <sup>2</sup>  |              | Further adjusted for CCI (binary) <sup>3</sup> |              |
|------------------|--------------------------------------------------|--------------|-----------------------------------------------------|--------------|------------------------------------------------|--------------|
|                  | HR (95%CI)                                       | P            | HR (95%CI)                                          | P            | HR (95%CI)                                     | P            |
| Per SD           | <b>0.83 [0.72, 0.95]</b>                         | <b>0.008</b> | <b>0.83 [0.72, 0.95]</b>                            | <b>0.007</b> | <b>0.83 [0.72, 0.95]</b>                       | <b>0.008</b> |
| Low              | Ref                                              |              | Ref                                                 |              | Ref                                            |              |
| Moderate         | 0.84 [0.62, 1.15]                                | 0.272        | 0.84 [0.62, 1.14]                                   | 0.260        | 0.84 [0.62, 1.15]                              | 0.276        |
| High             | <b>0.58 [0.41, 0.83]</b>                         | <b>0.003</b> | <b>0.58 [0.40, 0.83]</b>                            | <b>0.003</b> | <b>0.58 [0.41, 0.83]</b>                       | <b>0.003</b> |
| p-trend          |                                                  | <b>0.003</b> |                                                     | <b>0.003</b> |                                                | <b>0.003</b> |
|                  | Further adjusted for sleep duration <sup>4</sup> |              | Further adjusted for baseline diabetes <sup>5</sup> |              | Multiple imputation <sup>6</sup>               |              |
|                  | HR (95%CI)                                       | P            | HR (95%CI)                                          | P            | HR (95%CI)                                     | P            |
| Per SD           | <b>0.82 [0.72, 0.95]</b>                         | <b>0.006</b> | <b>0.83 [0.72, 0.95]</b>                            | <b>0.009</b> | <b>0.82 [0.71,0.94]</b>                        | <b>0.005</b> |
| Low              | Ref                                              |              | Ref                                                 |              | Ref                                            |              |
| Moderate         | 0.83 [0.61, 1.13]                                | 0.243        | 0.84 [0.62, 1.14]                                   | 0.268        | 0.83 [0.61,1.13]                               | 0.232        |
| High             | <b>0.57 [0.40, 0.82]</b>                         | <b>0.002</b> | <b>0.58 [0.41, 0.84]</b>                            | 0.003        | <b>0.57 [0.40,0.81]</b>                        | <b>0.002</b> |
| p-trend          |                                                  | <b>0.003</b> |                                                     | <b>0.004</b> |                                                | <b>0.002</b> |

Abbreviations: MEDAS, Mediterranean Diet Adherence Screener (score); BMI, body mass, index; CCI, Carlson comorbidity index; HR, hazard ratio; CI, confidence interval; SD, standard deviation.

1 Model adjusted for age, sex, total energy intake, ethnicity, education, Townsend deprivation index, smoking status, physical activity, and BMI.

2 Model adjusted for age, sex, total energy intake, ethnicity, education, Townsend deprivation index, smoking status, physical activity, and CCI (continuous).

3 Model adjusted for age, sex, total energy intake, ethnicity, education, Townsend deprivation index, smoking status, physical activity, and CCI (binary).

4 Model adjusted for age, sex, total energy intake, ethnicity, education, Townsend deprivation index, smoking status, physical activity, and sleep duration.

5 Model adjusted for age, sex, total energy intake, ethnicity, education, Townsend deprivation index, smoking status, physical activity, and baseline diabetes.

6 Missing values of covariates filled using multiple imputation, model adjusted for age, sex, total energy intake, ethnicity, education, Townsend deprivation index, smoking status, and physical activity.

**Table S10.** Association between Mediterranean diet adherence and the risk of chronic pancreatitis by excluding participants who developed chronic pancreatitis within 3, 4, and 5 years of follow-up.

| MEDAS continuous | Excluded participants developed chronic pancreatitis within 3-year (N=190,774) |                          |              | Excluded participants developed chronic pancreatitis within 4-year (N=190,745) |                          |              | Excluded participants developed chronic pancreatitis within 5-year (N=190,725) |                          |              |
|------------------|--------------------------------------------------------------------------------|--------------------------|--------------|--------------------------------------------------------------------------------|--------------------------|--------------|--------------------------------------------------------------------------------|--------------------------|--------------|
|                  | Cases/person-year                                                              | HR (95%CI)               | <i>P</i>     | Cases/person-year                                                              | HR (95%CI)               | <i>P</i>     | Cases/person-year                                                              | HR (95%CI)               | <i>P</i>     |
| Per SD           |                                                                                | <b>0.85 [0.74, 0.98]</b> | <b>0.028</b> |                                                                                | <b>0.84 [0.71, 0.98]</b> | <b>0.025</b> |                                                                                | <b>0.83 [0.70, 0.98]</b> | <b>0.025</b> |
| Low              | 85/693,265                                                                     | Ref                      |              | 75/693,229                                                                     | Ref                      |              | 67/693,205                                                                     | Ref                      |              |
| Moderate         | 70/687,544                                                                     | 0.91 [0.66, 1.26]        | 0.575        | 58/687,518                                                                     | 0.86 [0.61, 1.22]        | 0.407        | 52/687,493                                                                     | 0.87 [0.61, 1.26]        | 0.469        |
| High             | 43/684,618                                                                     | <b>0.60 [0.41, 0.88]</b> | <b>0.008</b> | 36/684,579                                                                     | <b>0.58 [0.39, 0.87]</b> | <b>0.009</b> | <b>30/684,542</b>                                                              | <b>0.55 [0.35, 0.86]</b> | <b>0.008</b> |
| <i>p</i> -trend  |                                                                                |                          | <b>0.010</b> |                                                                                |                          | <b>0.010</b> |                                                                                |                          | <b>0.009</b> |

Abbreviations: MEDAS, Mediterranean Diet Adherence Screener (score); BMI, body mass, index; CCI, Carlson comorbidity index; HR, hazard ratio; CI, confidence interval; SD, standard deviation.

**Table S11.** Association between Mediterranean diet adherence and the risk of chronic pancreatitis restricted participants to those who completed at least two 24-hour diet recalls with typical dietary intake (n=102,401).

| MEDAS continuous | Cases/person-years | Minimally adjusted model |              | Fully adjusted model     |              |
|------------------|--------------------|--------------------------|--------------|--------------------------|--------------|
|                  |                    | HR (95%CI)               | <i>P</i>     | HR (95%CI)               | <i>P</i>     |
| Per SD           |                    | <b>0.75 [0.61, 0.92]</b> | <b>0.006</b> | <b>0.78 [0.63, 0.95]</b> | <b>0.016</b> |
| Low              | 41/288,002         | Ref                      |              | Ref                      |              |
| Moderate         | 34/361,949         | 0.70 [0.44, 1.10]        | 0.119        | 0.73 [0.46, 1.15]        | 0.177        |
| High             | <b>24/415,130</b>  | <b>0.46 [0.28, 0.77]</b> | <b>0.003</b> | <b>0.49 [0.29, 0.82]</b> | <b>0.006</b> |
| <i>p</i> -trend  |                    |                          | <b>0.003</b> |                          | <b>0.006</b> |

Abbreviations: CI, confidence interval.

**Table S12.** Mediation effect of inflammation and metabolic status between the Mediterranean diet adherence defined by the MEDAS continuous score and the risk of chronic pancreatitis.

|                    | Average causal mediation effects (ACME) |                      |          | Average direct effects (ADE) |                      |          | Total effect |                      |          | The proportion of mediation effect |              |          |
|--------------------|-----------------------------------------|----------------------|----------|------------------------------|----------------------|----------|--------------|----------------------|----------|------------------------------------|--------------|----------|
|                    | Estimate                                | 95% CI               | <i>P</i> | Estimate                     | 95% CI               | <i>P</i> | Estimate     | 95% CI               | <i>P</i> | Proportion                         | 95% CI       | <i>P</i> |
| C-reactive protein | -1.64e-06                               | -8.53e-06, 5.35e-06  | 0.576    | -4.29e-04                    | -9.92e-04, -9.91e-05 | <0.001   | -4.31e-04    | -9.95e-04, -1.03e-04 | <0.001   | 0.44%                              | -1.18%,2.82% | 0.576    |
| Metabolic status   | -2.15e-05                               | -4.17e-05, -8.70e-06 | <0.001   | -4.61e-04                    | -1.09e-03, -9.60e-5  | 0.004    | -4.83e-04    | -1.13e-03, -1.09e-04 | <0.001   | 4.74%                              | 2.01%,12.05% | <0.001   |

Abbreviations: MEDAS, Mediterranean Diet Adherence Screener (score); CI, confidence interval.
